# Supplementary material for: Taxogenomics Resolves Conflict in the Genus Rhodobacter: A Two and Half Decades Pending Thought to Reclassify the Genus Rhodobacter
Source: PubMed Central journal article supplement (PMC6834548; doi:10.3389/fmicb.2019.02480), 2019-10-31
Supplement: Data_Sheet_1.pdf [file Data_Sheet_1.pdf]

Table. S1. The organisms used in this study, isolation sources and genome accession numbers

| Organisms                                                         | Source of Isolation                   | Accession number      |
|-------------------------------------------------------------------|---------------------------------------|-----------------------|
| <i>Rhodobacter capsulatus</i> DSM 1710 <sup>T</sup>               | Sewage plants, eutrophic ponds        | QKZO00000000          |
| <i>Rhodobacter viridis</i> JA737 <sup>T</sup>                     | Mud of a stream                       | QJTK00000000          |
| <i>Rhodobacter maris</i> JA276 <sup>T</sup>                       | Marine sediment                       | OBMT00000000          |
| <i>Rhodobacter aestuarii</i> JA296 <sup>T</sup>                   | Estuarine environment                 | FTOG00000000          |
| <i>Rhodobacter sphaeroides</i> 2.4.1 <sup>T</sup>                 | Sewage plants, eutrophic ponds        | CP030271 and CP030272 |
| <i>Rhodobacter johrii</i> JA192 <sup>T</sup>                      | Rhizosphere soil                      | MABH00000000          |
| <i>Rhodobacter megalophilus</i> JA194 <sup>T</sup>                | Soil, Himalayas                       | FZOV00000000          |
| <i>Rhodobacter azotoformans</i> KA25 <sup>T</sup>                 | Sludge for waste water treatment      | QAOT00000000          |
| <i>Rhodobacter ovatus</i> JA234 <sup>T</sup>                      | Polluted pond                         | OAQO00000000          |
| <i>Rhodobacter vinaykumarii</i> JA123 <sup>T</sup>                | Seawater                              | OBMN00000000          |
| <i>Rhodobacter veldkampii</i> ATCC 35703 <sup>T</sup>             | Freshwater                            | PZKF00000000          |
| <i>Rhodobacter blasticus</i> DSM 2131T                            | Eutrophic pond                        | PZKE00000000          |
| <i>Cereibacter changlensis</i> JA139 <sup>T</sup>                 | Snow sample                           | PZKG00000000          |
| <i>Defluviimonas denitrificans</i> DSM 18921 <sup>T</sup>         | Marine aquaculture                    | PVEP00000000          |
| <i>Falsirhodobacter</i> sp. alg1                                  | Brown algae                           | BBJC00000000          |
| <i>Haematobacter missouriensis</i> CCUG 52307 <sup>T</sup>        | Septicemic patient                    | JFGS00000000          |
| <i>Paenirhodobacter enshiensis</i> DW2-9 <sup>T</sup>             | Soil                                  | JFZB00000000          |
| <i>Pseudorhodobacter ferrugineus</i> DSM 5888 <sup>T</sup>        | Seawater of the Baltic Sea            | ATVN00000000          |
| <i>Thioclava pacifica</i> DSM 10166 <sup>T</sup>                  | Near-shore sulfidic hydrothermal area | AUND00000000          |
| <i>Gemmobacter aquatilis</i> DSM 3857 <sup>T</sup>                | Fresh water                           | FOCE00000000          |
| <i>Pararhodobacter aggregans</i> DSM 18938 <sup>T</sup>           | Marine aquaculture                    | QBKF00000000          |
| <i>Rhodobaca barguzinensis</i> alga-05 <sup>T</sup>               | Sediments of a saline                 | CP024899              |
| <i>Roseicitreum antarcticum</i> CGMCC 1.8894 <sup>T</sup>         | Sandy intertidal sediment             | FNOM00000000          |
| <i>Roseinatronobacter thiooxidans</i> DSM 13087 <sup>T</sup>      | Soda lakes                            | MEHT00000000          |
| <i>Rhodovulum sulfidophilum</i> DSM 1374 <sup>T</sup>             | Sea sediment                          | CP015418              |
| <i>Albimonas donghaensis</i> DSM 17890 <sup>T</sup>               | Seawater                              | FNMZ00000000          |
| <i>Paracoccus denitrificans</i> DSM 413 <sup>T</sup>              | Soil                                  | FNEA00000000          |
| <i>Roseobacter litoralis</i> Och 149 <sup>T</sup>                 | Seaweed                               | CP002623              |
| <i>Escherichia coli</i> ATCC 11775 <sup>T</sup>                   | Human, urine, cystitis                | JMST00000000          |
| <i>Pseudomonas aeruginosa</i> DSM 50071 <sup>T</sup>              | Soil and water                        | JYLC00000000          |
| <i>Sinorhodobacter ferrireducens</i> CCTCC AB2012026 <sup>T</sup> | Microbial fuel cell                   | SAVB00000000          |
| <i>Roseibaca ekhonensis</i> CECT 7235 <sup>T</sup>                | Lake water                            | UIHC00000000          |

Table S2. 16S rRNA gene sequence pairwise similarity percentages among the genus *Rhodobacter*

|    | 1    | 2    | 3    | 4    | 5    | 6    | 7    | 8    | 9    | 10   | 11   | 12   | 13   | 14   | 15   | 16  |
|----|------|------|------|------|------|------|------|------|------|------|------|------|------|------|------|-----|
| 1  | 100  |      |      |      |      |      |      |      |      |      |      |      |      |      |      |     |
| 2  | 100  | 100  |      |      |      |      |      |      |      |      |      |      |      |      |      |     |
| 3  | 99.9 | 99.9 | 100  |      |      |      |      |      |      |      |      |      |      |      |      |     |
| 4  | 98.1 | 98.1 | 98.1 | 100  |      |      |      |      |      |      |      |      |      |      |      |     |
| 5  | 98.5 | 98.5 | 98.5 | 98.8 | 100  |      |      |      |      |      |      |      |      |      |      |     |
| 6  | 98.4 | 98.4 | 98.5 | 97.5 | 98.1 | 100  |      |      |      |      |      |      |      |      |      |     |
| 7  | 95.6 | 95.6 | 95.7 | 95.4 | 95.5 | 95.8 | 100  |      |      |      |      |      |      |      |      |     |
| 8  | 95.7 | 95.7 | 95.7 | 94.8 | 95.0 | 94.7 | 95.7 | 100  |      |      |      |      |      |      |      |     |
| 9  | 95.8 | 95.8 | 95.8 | 94.8 | 95.1 | 94.8 | 95.6 | 99.5 | 100  |      |      |      |      |      |      |     |
| 10 | 95.4 | 95.4 | 95.4 | 94.4 | 94.7 | 94.4 | 95.3 | 99.5 | 99.9 | 100  |      |      |      |      |      |     |
| 11 | 94.9 | 94.9 | 94.9 | 93.8 | 94.1 | 93.8 | 94.6 | 98.9 | 99.3 | 99.4 | 100  |      |      |      |      |     |
| 12 | 95.1 | 95.1 | 95.1 | 94.4 | 94.8 | 95.0 | 94.4 | 96.8 | 97.0 | 96.7 | 96.2 | 100  |      |      |      |     |
| 13 | 95.0 | 95.0 | 94.9 | 94.0 | 94.8 | 94.5 | 94.9 | 97.5 | 97.3 | 97.1 | 96.4 | 97.8 | 100  |      |      |     |
| 14 | 93.9 | 93.9 | 93.9 | 92.8 | 93.8 | 93.5 | 93.7 | 96.5 | 97.0 | 97.0 | 96.9 | 96.8 | 98.4 | 100  |      |     |
| 15 | 94.8 | 94.8 | 94.7 | 94.8 | 94.7 | 94.7 | 94.6 | 94.8 | 94.7 | 94.5 | 94.0 | 95.6 | 95.0 | 94.5 | 100  |     |
| 16 | 95.9 | 95.9 | 95.9 | 95.0 | 95.6 | 95.5 | 95.2 | 96.3 | 96.4 | 96.1 | 95.5 | 97.8 | 96.5 | 95.9 | 95.9 | 100 |

1- *Rhodobacter sphaeroides* 2.4.1<sup>T</sup>; 2- *Rhodobacter megalophilus* JA194<sup>T</sup>; 3- *Rhodobacter johrii* JA192<sup>T</sup>; 4- *Rhodobacter azotoformans* KA25<sup>T</sup>; 5- *Rhodobacter ovatus* JA234<sup>T</sup>; 6- *Rhodobacter alkalitolerans* JA916<sup>T</sup>; 7- *Rhodobacter blasticus* DSM 2131<sup>T</sup>; 8- *Rhodobacter capsulatus* ATCC 11166<sup>T</sup>; 9- *Rhodobacter viridis* JA737<sup>T</sup>; 10- *Rhodobacter sediminis* N1<sup>T</sup>; 11- *Rhodobacter azollae* JA912<sup>T</sup>; 12- *Rhodobacter aestuarii* JA296<sup>T</sup>; 13- *Rhodobacter maris* JA276<sup>T</sup>; 14- *Rhodobacter lacus* JA826<sup>T</sup>; 15- *Rhodobacter veldkampii* ATCC 35703<sup>T</sup>; 16- *Rhodobacter vinaykumarii* JA123<sup>T</sup>.

Table S3. Genomic information of species/strains of genus *Rhodobacter*.

| Organism name                                  | Genome size (Mb) | Genome GC% | No of Genes | No. of proteins |
|------------------------------------------------|------------------|------------|-------------|-----------------|
| <b><i>Rhodobacter sensu stricto</i> clade</b>  |                  |            |             |                 |
| <i>Rba. capsulatus</i> DSM 1710 <sup>T</sup>   | 3.66             | 66.5       | 3495        | 3346            |
| Strain SB1003                                  | 3.87             | 66.6       | 3660        | 3531            |
| Strain DSM 938                                 | 3.86             | 66.3       | 3742        | 3593            |
| Strain DE442                                   | 3.76             | 66.6       | 3593        | 3446            |
| Strain B6                                      | 3.80             | 66.4       | 3607        | 3403            |
| Strain YW1                                     | 3.64             | 66.6       | 3497        | 3354            |
| Strain YW2                                     | 3.77             | 66.4       | 3576        | 3414            |
| Strain R121                                    | 3.76             | 66.6       | 3588        | 3446            |
| Strain Y262                                    | 3.84             | 66.5       | 3683        | 3528            |
| Strain B41                                     | 3.67             | 66.5       | 3480        | 3331            |
| Strain A52                                     | 3.60             | 66.5       | 3411        | 3357            |
| <i>Rba. viridis</i> JA737 <sup>T</sup>         | 3.86             | 65.3       | 3701        | 3481            |
| <i>Rba. maris</i> JA276 <sup>T</sup>           | 3.83             | 65         | 3745        | 3557            |
| <i>Rba. aestuarii</i> JA296 <sup>T</sup>       | 3.84             | 61         | 3695        | 3544            |
| <b><i>Rba. sphaeroides</i> Clade</b>           |                  |            |             |                 |
| <i>Rba. sphaeroides</i> ATH 2.4.1 <sup>T</sup> | 4.60             | 68.7       | 4474        | 4280            |
| Strain ATCC 17025                              | 4.55             | 68.2       | 4547        | 4280            |
| Strain ATCC 17029                              | 4.48             | 68.9       | 4338        | 4170            |
| Strain KD131                                   | 4.71             | 69.1       | 4530        | 4367            |
| Strain MBTLJ-8                                 | 4.66             | 68.7       | 4580        | 4374            |
| Strain MBTLJ-13                                | 4.64             | 68.7       | 4561        | 4360            |
| Strain MBTLJ-20                                | 4.65             | 68.7       | 4596        | 4365            |
| Strain EBL0706                                 | 4.43             | 68.3       | 4387        | 4024            |
| Strain AB25                                    | 4.58             | 69.1       | 4489        | 4279            |
| Strain AB27                                    | 4.4              | 69.0       | 4381        | 4084            |
| Strain AB29                                    | 4.54             | 69.0       | 4502        | 4192            |
| Strain AB24                                    | 4.74             | 69.0       | 4692        | 4389            |
| Strain WS8N                                    | 4.41             | 69.1       | 4317        | 4164            |
| <i>Rba. johrii</i> JA192 <sup>T</sup>          | 4.51             | 69.0       | 4458        | 4093            |
| Strain CDR-SL7Cii                              | 4.68             | 69.1       | 4496        | 4330            |
| <i>Rba. megalophilus</i> JA194 <sup>T</sup>    | 4.86             | 68.8       | 4690        | 4552            |
| <i>Rba. azotoformans</i> KA25 <sup>T</sup>     | 4.41             | 68.4       | 4369        | 4112            |
| Strain YLK20                                   | 4.32             | 68.5       | 4327        | 3980            |
| <i>Rba. ovatus</i> JA234 <sup>T</sup>          | 3.81             | 66.5       | 3668        | 3422            |
| <b><i>Rba. veldkampii</i> Clade</b>            |                  |            |             |                 |
| <i>Rba. veldkampii</i> DSM 11550 <sup>T</sup>  | 3.26             | 65         | 3273        | 3019            |
| <i>Rba. vinaykumarii</i> JA123 <sup>T</sup>    | 3.48             | 68.2       | 3281        | 3122            |
| <b><i>Rba. blasticus</i> Clade</b>             |                  |            |             |                 |
| <i>Rba. blasticus</i> DSM 2131 <sup>T</sup>    | 3.58             | 66.5       | 3455        | 3441            |
| Strain 28/5                                    | 3.70             | 66.4       | 3595        | 3494            |

Table S4: BPGA of all 12 species of genus *Rhodobacter*

| Organism name                                        | No. of core genes | No. of accessory genes | No. of unique genes | No. of exclusively absent genes |
|------------------------------------------------------|-------------------|------------------------|---------------------|---------------------------------|
| 12 species of genus <i>Rhodobacter</i>               |                   |                        |                     |                                 |
| <i>Rba. aestuarii</i> JA296                          | 1239              | 1655                   | 699                 | 9                               |
| <i>Rba. azotoformans</i> KA25                        | 1239              | 2233                   | 730                 | 7                               |
| <i>Rba. blasticus</i> ATCC 33485                     | 1239              | 1127                   | 1113                | 57                              |
| <i>Rba. capsulatus</i> ATCC11166                     | 1239              | 1791                   | 421                 | 2                               |
| <i>Rba. johrii</i> JA192                             | 1239              | 2594                   | 262                 | 34                              |
| <i>Rba. maris</i> JA276                              | 1239              | 1832                   | 554                 | 5                               |
| <i>Rba. megalophilus</i> JA194                       | 1239              | 2961                   | 269                 | 0                               |
| <i>Rba. ovatus</i> JA234                             | 1239              | 1655                   | 588                 | 8                               |
| <i>Rba. sphaeroides</i> ATH 2.4.1                    | 1239              | 2478                   | 130                 | 3                               |
| <i>Rba. veldkampii</i> ATCC 35703                    | 1239              | 1127                   | 657                 | 48                              |
| <i>Rba. vinaykumarii</i> JA123                       | 1239              | 1184                   | 720                 | 26                              |
| <i>Rba. viridis</i> JA737                            | 1239              | 1776                   | 543                 | 8                               |
| Pan-genome analysis of <i>Rba. sphaeroides</i> clade |                   |                        |                     |                                 |
| <i>Rba. azotoformans</i> KA25                        | 2294              | 1082                   | 820                 | 66                              |
| <i>Rba. johrii</i> JA192                             | 2294              | 1508                   | 293                 | 90                              |
| <i>Rba. megalophilus</i> JA194                       | 2294              | 1827                   | 345                 | 2                               |
| <i>Rba. ovatus</i> JA234                             | 2294              | 437                    | 748                 | 531                             |
| <i>Rba. sphaeroides</i> ATH 2.4.1                    | 2294              | 1402                   | 149                 | 30                              |
| Pan-genome analysis of <i>Rba. capsulatus</i> clade  |                   |                        |                     |                                 |
| <i>Rba. aestuarii</i> JA296                          | 2225              | 571                    | 791                 | 130                             |
| <i>Rba. capsulatus</i> ATCC11166                     | 2225              | 684                    | 537                 | 53                              |
| <i>Rba. maris</i> JA276                              | 2225              | 665                    | 727                 | 87                              |
| <i>Rba. viridis</i> JA737                            | 2225              | 668                    | 663                 | 80                              |
| Pan-genome analysis of <i>Rba. veldkampii</i> clade  |                   |                        |                     |                                 |
| <i>Rba. vinaykumarii</i> JA123                       | 2014              | 0                      | 1123                | 1004                            |
| <i>Rba. veldkampii</i> ATCC 35703                    | 2014              | 0                      | 1004                | 1123                            |



Taxa; 1- *Rhodobacter capsulatus* ATCC 11166<sup>T</sup>; 2- *Rhodobacter viridis* JA737<sup>T</sup>; 3- *Rhodobacter maris* JA276<sup>T</sup>; 4- *Rhodobacter aestuarii* JA296<sup>T</sup>; 5- *Rhodobacter sphaeroides* 2.4.1<sup>T</sup>; 6- *Rhodobacter johrii* JA192<sup>T</sup>; 7- *Rhodobacter megalophilus* JA194<sup>T</sup>; 8- *Rhodobacter azotoformans* KA25<sup>T</sup>; 9- *Rhodobacter ovatus* JA234<sup>T</sup>; 10- *Rhodobacter vinaykumarii* JA123<sup>T</sup>; 11- *Rhodobacter veldkampii* ATCC 35703<sup>T</sup>; 12- *Rhodobacter blasticus* DSM 213<sup>T</sup>; 13- *Cereibacter changlensis* JA139<sup>T</sup>; 14- *Defluviimonas denitrificans* DSM 18921<sup>T</sup>; 15- *Falsirhodobacter* sp. alg1; 16- *Haematobacter missouriensis* CCUG 52307<sup>T</sup>; 17- *Paenirhodobacter enshiensis* DW2-9<sup>T</sup>; 18- *Pseudorhodobacter ferrugineus* DSM 5888<sup>T</sup>; 19- *Thioclava pacifica* DSM 10166<sup>T</sup>; 20- *Gemmobacter aquatilis* DSM 3857<sup>T</sup>; 21- *Pararhodobacter aggregans* DSM 18938<sup>T</sup>; 22- *Rhodobaca barguzinensis* alga-05<sup>T</sup>; 23- *Roseicitreum antarcticum* CGMCC 1.8894<sup>T</sup>; 24- *Roseinatronobacter thiooxidans* DSM 13087<sup>T</sup>; 25- *Rhodovulum sulfidophilum* DSM 1374<sup>T</sup>; 26- *Albimonas donghaensis* DSM 17890<sup>T</sup>; 27- *Paracoccus denitrificans* DSM 413<sup>T</sup>; 28- *Roseobacter litoralis* Och 149<sup>T</sup>; 29- *Escherichia coli* ATCC 11775<sup>T</sup>; 30- *Pseudomonas aeruginosa* DSM 50071<sup>T</sup>; 31- *Sinorhodobacter ferrireducens* CCTCC AB2012026<sup>T</sup>; 32- *Roseibaca ekhonensis* CECT 7235<sup>T</sup>. *Rba. sphaeroides* clade member values in red color; *Rba. capsulatus* clade member values in light brown color; *Rba. veldkampii* clade (*Rba. veldkampii* and *Rba. vinaykumarii*) member values in pink color.



Taxa; 1- *Rhodobacter capsulatus* ATCC 11166<sup>T</sup>; 2- *Rhodobacter viridis* JA737<sup>T</sup>; 3- *Rhodobacter maris* JA276<sup>T</sup>; 4- *Rhodobacter aestuarii* JA296<sup>T</sup>; 5- *Rhodobacter sphaeroides* 2.4.1<sup>T</sup>; 6- *Rhodobacter johrii* JA192<sup>T</sup>; 7- *Rhodobacter megalophilus* JA194<sup>T</sup>; 8- *Rhodobacter azotoformans* KA25<sup>T</sup>; 9- *Rhodobacter ovatus* JA234<sup>T</sup>; 10- *Rhodobacter vinaykumarii* JA123<sup>T</sup>; 11- *Rhodobacter veldkampii* ATCC 35703<sup>T</sup>; 12- *Rhodobacter blasticus* DSM 213<sup>T</sup>; 13- *Cereibacter changlensis* JA139<sup>T</sup>; 14- *Defluviimonas denitrificans* DSM 18921<sup>T</sup>; 15- *Falsirhodobacter* sp. alg1; 16- *Haematobacter missouriensis* CCUG 52307<sup>T</sup>; 17- *Paenirhodobacter enshiensis* DW2-9<sup>T</sup>; 18- *Pseudorhodobacter ferrugineus* DSM 5888<sup>T</sup>; 19- *Thioclava pacifica* DSM 10166<sup>T</sup>; 20- *Gemmobacter aquatilis* DSM 3857<sup>T</sup>; 21- *Pararhodobacter aggregans* DSM 18938<sup>T</sup>; 22- *Rhodobaca barguzinensis* alga-05<sup>T</sup>; 23- *Roseicitreum antarcticum* CGMCC 1.8894<sup>T</sup>; 24- *Roseinatronobacter thiooxidans* DSM 13087<sup>T</sup>; 25- *Rhodovulum sulfidophilum* DSM 1374<sup>T</sup>; 26- *Albimonas donghaensis* DSM 17890<sup>T</sup>; 27- *Paracoccus denitrificans* DSM 413<sup>T</sup>; 28- *Roseobacter litoralis* Och 149<sup>T</sup>; 29- *Escherichia coli* ATCC 11775<sup>T</sup>; 30- *Pseudomonas aeruginosa* DSM 50071<sup>T</sup>; 31- *Sinorhodobacter ferrireducens* CCTCC AB2012026<sup>T</sup>; 32- *Roseibaca ekhonensis* CECT 7235<sup>T</sup>. *Rba. sphaeroides* clade member values in red color; *Rba. capsulatus* clade member values in light brown color; *Rba. veldkampii* clade (*Rba. veldkampii* and *Rba. vinaykumarii*) member values in pink color.
